# Supplementary material for: Depth-Dependent C-N-P Stocks and Stoichiometry in Ultisols Resulting from Conversion of Secondary Forests to Plantations and Driving Forces
Source: MDPI journal article supplement (doi:10.3390/f12101300), 2021-09-24
Supplement: s1 [file s1]

## Supplemental material:

**Table S1.** Structure of five types of forests located in Yunfu, Guangdong province, South China.

| Species                       | DBH <sup>1</sup> (cm) | Tree height (m) | Age (a) | Density (individuals ha <sup>-1</sup> ) |
|-------------------------------|-----------------------|-----------------|---------|-----------------------------------------|
| Secondary forest <sup>2</sup> | 13.7                  | 9.6             | 26.1    | 1597.7                                  |
| Masson pine <sup>3</sup>      | 15.9                  | 10.6            | 14.7    | 1451.0                                  |
| Slash pine <sup>4</sup>       | 13.3                  | 8.2             | 15.0    | 1384.0                                  |
| Eucalypt <sup>5</sup>         | 10.3                  | 11.6            | 4.8     | 1886.8                                  |
| Litchi <sup>6</sup>           | 8.2                   | 4.1             | 18.9    | 671.7                                   |

Note: <sup>1</sup> DBH, diameter at breast height; <sup>2</sup> secondary forest, secondary mixed deciduous and broad-leaved forest; <sup>3</sup> Masson pine, *Pinus massoniana* Lamb.; <sup>4</sup> Slash pine, *Pinus elliottii* Engelm.; <sup>5</sup> Eucalypt, *Eucalyptus obliqua* L'Hér.; <sup>6</sup> Litchi, *Litchi chinensis* Sonn., 1782.
